# Supplementary material for: Multi-trait polygenic risk scores improve genomic prediction of atrial fibrillation across diverse ancestries
Source: Research Square preprint supplement (doi:10.21203/rs.3.rs-7713077/v1), 2025-10-03
Supplement: Supplementary file 1 [file 3e51c962500616f0669f69b6.xlsx]

## Sheet: Index
N	Sheet Names	Titles
S1	Mult_A	Performance metrics for the Roselli et al., ancestry-specific, ALLmeta, and Mult-a polygenic scores (PGS)
S2	Mult_T	Performance metrics for the Roselli et al., ALLmeta, all-tuned, and ancestry-tuned Mult-t PGSs
S3	Main_Results	Performance metrics for the Roselli et al., ALLmeta, and ancestry-tuned Mult-t PGSs
S4	AoU_Tune_Test	Case and control counts by ancestry in the tuning and validation sets from All of Us (AoU)
S5	PRSmix+	Performance metrics for the Roselli et al., PRSmix+, ALLmeta, and ancestry-tuned Mult-t PGSs
S6	Mixing_Weights	Mult-t PGS decomposition: mixing weights, proportions, and tuning set standard deviations for trait-specific scores
S7	Unscaled_Coef	Mult-t PGS decomposition: unscaled regression coefficients, proportions, and tuning set Nagelkerke’s R² for trait-specific scores
S8	Separate_Traits	Performance metrics for the trait-specific PGSs
S9	UKB_Results	Performance metrics for the Roselli et al., Mult-t-AFR, and Mult-t-ASN PGSs validated in the UK Biobank
S10	noMA_noVA	Performance metrics for the sensitivity analysis excluding individuals from Massachusetts (MA) and with Veteran Affairs (VA) affiliation
S11	Subsets	Performance metrics for the subset analysis of the Mult-t-EUR PGS
S12	Training_Data	Case and control counts and cohort sources for training data on atrial fibrillation (AF) and related traits
S13	Pheno_codes	Definitions of the phenotypes atrial fibrillation (AFib) and atrial flutter (AFlut) used for AoU analyses

## Sheet: Mult_A
Cohort	PGS	Cases	Total	Beta.full	SE.full	P.full	OR.full	CI.L.OR.full	CI.H.OR.full	AUROC.prs	CI.L.AUROC.prs	CI.H.AUROC.prs	AUPRC.prs	ngk_R2_delta_o_resid	liab_R2_delta_o_resid
EUR	Roselli et al.	11087	124367	0.463	0.01	<1.00E-300	1.59	1.56	1.62	0.613	0.608	0.619	0.137	0.04	0.059
EUR	EURmeta	11087	124367	0.543	0.01	<1.00E-300	1.72	1.69	1.76	0.631	0.626	0.637	0.15	0.058	0.09
EUR	ALLmeta	11087	124367	0.597	0.011	<1.00E-300	1.82	1.78	1.85	0.642	0.637	0.647	0.155	0.065	0.098
EUR	Mult-a-EUR	11087	124367	0.597	0.01	<1.00E-300	1.82	1.78	1.85	0.644	0.638	0.649	0.158	0.068	0.103
AFR	Roselli et al.	2112	44692	0.189	0.024	1.41E-14	1.21	1.15	1.27	0.548	0.536	0.561	0.056	0.004	0.008
AFR	AFRmeta	2112	44692	0.161	0.023	3.14E-12	1.17	1.12	1.23	0.541	0.528	0.553	0.056	0.004	0.007
AFR	ALLmeta	2112	44692	0.274	0.024	3.67E-30	1.32	1.25	1.38	0.566	0.554	0.579	0.061	0.01	0.018
AFR	Mult-a-AFR	2112	44692	0.266	0.023	5.84E-30	1.3	1.25	1.37	0.567	0.555	0.58	0.06	0.01	0.018
AMR	Roselli et al.	1449	40219	0.29	0.026	6.73E-28	1.34	1.27	1.41	0.578	0.562	0.593	0.05	0.012	0.024
AMR	AMRmeta	1449	40219	0.081	0.021	7.98E-05	1.08	1.04	1.13	0.525	0.51	0.541	0.04	0.002	0.003
AMR	ALLmeta	1449	40219	0.332	0.026	2.84E-37	1.39	1.32	1.47	0.591	0.576	0.606	0.053	0.017	0.032
AMR	Mult-a-AMR	1449	40219	0.331	0.026	2.84E-37	1.39	1.32	1.47	0.591	0.576	0.606	0.053	0.017	0.032
Note: AFR, African; ALL, all-ancestry; AMR, Admixed American; AUROC, Area Under the Receiver Operator Curve; AUPRC, Area Under the Precision Recall Curve; Beta, effect size; CI.H.OR/AUROC, Confidence Interval Upper Bound; CI.L.OR/AUROC, Confidence Interval Lower Bound; EUR, European; .full, full model with age and sex as covariates; liab_R2_delta_o_resid, Liability delta R² (ΔR² = R²_full − R²_ba…

## Sheet: Mult_T
Cohort	PGS	Cases	Total	Beta.full	SE.full	P.full	OR.full	CI.L.OR.full	CI.H.OR.full	AUROC.prs	CI.L.AUROC.prs	CI.H.AUROC.prs	AUPRC.prs	ngk_R2_delta_o_resid	liab_R2_delta_o_resid
EUR	Roselli et al.	11087	124367	0.463	0.01	<1.00E-300	1.59	1.56	1.62	0.613	0.608	0.619	0.137	0.04	0.059
EUR	ALLmeta	11087	124367	0.597	0.011	<1.00E-300	1.82	1.78	1.85	0.642	0.637	0.647	0.155	0.065	0.098
EUR	Mult-t-ALL	11087	124367	0.632	0.011	<1.00E-300	1.88	1.84	1.92	0.644	0.639	0.65	0.156	0.069	0.107
EUR	Mult-t-EUR	11087	124367	0.635	0.011	<1.00E-300	1.89	1.85	1.93	0.646	0.641	0.652	0.157	0.071	0.11
AFR	Roselli et al.	2112	44692	0.189	0.025	1.43E-14	1.21	1.15	1.27	0.548	0.536	0.561	0.056	0.004	0.008
AFR	ALLmeta	2112	44692	0.274	0.024	3.76E-30	1.32	1.25	1.38	0.566	0.554	0.579	0.061	0.01	0.018
AFR	Mult-t-ALL	2112	44692	0.278	0.023	1.16E-32	1.32	1.26	1.38	0.566	0.554	0.579	0.061	0.011	0.02
AFR	Mult-t-AFR	2112	44692	0.328	0.024	6.42E-43	1.39	1.32	1.45	0.573	0.56	0.585	0.064	0.014	0.028
AMR	Roselli et al.	1449	40219	0.29	0.027	6.98E-28	1.34	1.27	1.41	0.578	0.562	0.593	0.05	0.012	0.024
AMR	ALLmeta	1449	40219	0.332	0.026	2.93E-37	1.39	1.32	1.47	0.591	0.576	0.606	0.053	0.017	0.032
AMR	Mult-t-ALL	1449	40219	0.349	0.026	9.59E-41	1.42	1.35	1.49	0.594	0.579	0.609	0.054	0.019	0.037
AMR	Mult-t-AMR	1449	40219	0.373	0.027	7.11E-45	1.45	1.38	1.53	0.595	0.58	0.61	0.054	0.021	0.043
ASN	Roselli et al.	288	10638	0.418	0.061	5.17E-12	1.52	1.35	1.71	0.611	0.578	0.644	0.042	0.024	0.044
ASN	ALLmeta	288	10638	0.49	0.061	1.13E-15	1.63	1.45	1.84	0.633	0.6	0.666	0.045	0.032	0.056
ASN	Mult-t-ASN	288	10638	0.567	0.062	8.81E-20	1.76	1.56	1.99	0.637	0.603	0.672	0.055	0.042	0.074
Note: AFR, African; ALL, all-ancestry; AMR, Admixed American; ASN, Asian (East Asian + South Asian); AUROC, Area Under the Receiver Operator Curve; AUPRC, Area Under the Precision Recall Curve; Beta, effect size; CI.H.OR/AUROC, Confidence Interval Upper Bound; CI.L.OR/AUROC, Confidence Interval Lower Bound; EUR, European; .full, full model with age and sex as covariates; liab_R2_delta_o_resid, Li…

## Sheet: Main_Results
Cohort	PGS	Cases	Total	Beta.full	SE.full	P.full	OR.full	CI.L.OR.full	CI.H.OR.full	AUROC.prs	CI.L.AUROC.prs	CI.H.AUROC.prs	AUPRC.prs	ngk_R2_delta_o_resid	liab_R2_delta_o_resid
EUR	Roselli et al.	11087	124367	0.463	0.01	<1.00E-300	1.59	1.56	1.62	0.613	0.608	0.619	0.137	0.04	0.059
EUR	ALLmeta	11087	124367	0.597	0.011	<1.00E-300	1.82	1.78	1.85	0.642	0.637	0.647	0.155	0.065	0.098
EUR	Mult-t-EUR	11087	124367	0.635	0.011	<1.00E-300	1.89	1.85	1.93	0.646	0.641	0.652	0.157	0.071	0.11
AFR	Roselli et al.	2112	44692	0.189	0.025	1.43e-14	1.21	1.15	1.27	0.548	0.536	0.561	0.056	0.004	0.008
AFR	ALLmeta	2112	44692	0.274	0.024	3.76e-30	1.32	1.25	1.38	0.566	0.554	0.579	0.061	0.01	0.018
AFR	Mult-t-AFR	2112	44692	0.328	0.024	6.42e-43	1.39	1.32	1.45	0.573	0.56	0.585	0.064	0.014	0.028
AMR	Roselli et al.	1449	40219	0.29	0.027	6.98e-28	1.34	1.27	1.41	0.578	0.562	0.593	0.05	0.012	0.024
AMR	ALLmeta	1449	40219	0.332	0.026	2.93e-37	1.39	1.32	1.47	0.591	0.576	0.606	0.053	0.017	0.032
AMR	Mult-t-AMR	1449	40219	0.373	0.027	7.11e-45	1.45	1.38	1.53	0.595	0.58	0.61	0.054	0.021	0.043
ASN	Roselli et al.	288	10638	0.418	0.061	5.17e-12	1.52	1.35	1.71	0.611	0.578	0.644	0.042	0.024	0.044
ASN	ALLmeta	288	10638	0.49	0.061	1.13e-15	1.63	1.45	1.84	0.633	0.6	0.666	0.045	0.032	0.056
ASN	Mult-t-ASN	288	10638	0.567	0.062	8.81e-20	1.76	1.56	1.99	0.637	0.603	0.672	0.055	0.042	0.074
Note: AFR, African; ALL, all-ancestry; AMR, Admixed American; ASN, Asian (East Asian + South Asian); AUROC, Area Under the Receiver Operator Curve; AUPRC, Area Under the Precision Recall Curve; Beta, effect size; CI.H.OR/AUROC, Confidence Interval Upper Bound; CI.L.OR/AUROC, Confidence Interval Lower Bound; EUR, European; .full, full model with age and sex as covariates; liab_R2_delta_o_resid, Li…

## Sheet: AoU_Tune_Test
Tune (30%)					Note: case / control numbers are shown; AFR, African; AMR, Admixed American; ASN, Asian (East Asian + South Asian); EUR, European; Test, Validation set; Tune, Tuning set.
EUR	AFR	AMR	EUR+AFR+AMR
4,856 / 49,357	887 / 18,350	621 / 16,845	6,364 / 84,552
Test (70%)*
EUR	AFR	AMR	ASN*
11,087 / 113,280	2,112 / 42,580	1,449 / 38,770	288 / 10,350
*ASN (EAS+SAS) validation set was 100% due to small sample size

## Sheet: PRSmix+
Cohort	PRS	Cases	Total	Beta.full	SE.full	P.full	OR.full	CI.L.OR.full	CI.H.OR.full	AUC.prs	CI.L.AUC.prs	CI.H.AUC.prs	AUPRC.prs	ngk_R2_delta_o_resid	liab_R2_delta_o_resid
EUR	Roselli et al.	8189	93383	0.466	0.012	<1.00E-300	1.59	1.56	1.63	0.615	0.609	0.621	0.135	0.04	0.06
EUR	PRSmix+	8189	93383	0.488	0.012	<1.00E-300	1.63	1.59	1.67	0.618	0.611	0.624	0.138	0.045	0.07
EUR	ALLmeta	8189	93383	0.596	0.012	<1.00E-300	1.81	1.77	1.86	0.643	0.637	0.649	0.153	0.064	0.098
EUR	Mult-t-EUR	8189	93383	0.637	0.013	<1.00E-300	1.89	1.84	1.94	0.648	0.642	0.654	0.155	0.071	0.109
AFR	Roselli et al.	2112	44692	0.189	0.025	1.43E-14	1.21	1.15	1.27	0.548	0.536	0.561	0.056	0.004	0.008
AFR	PRSmix+	2112	44692	0.254	0.026	3.17E-23	1.29	1.23	1.36	0.557	0.545	0.57	0.059	0.007	0.014
AFR	ALLmeta	2112	44692	0.274	0.024	3.76E-30	1.32	1.25	1.38	0.566	0.554	0.579	0.061	0.01	0.018
AFR	Mult-t-AFR	2112	44692	0.328	0.024	6.42E-43	1.39	1.32	1.45	0.573	0.56	0.585	0.064	0.014	0.028
AMR	Roselli et al.	1449	40219	0.29	0.027	6.98E-28	1.34	1.27	1.41	0.578	0.562	0.593	0.05	0.012	0.024
AMR	PRSmix+	1449	40219	0.308	0.027	4.06E-30	1.36	1.29	1.43	0.583	0.568	0.598	0.049	0.014	0.026
AMR	ALLmeta	1449	40219	0.332	0.026	2.93E-37	1.39	1.32	1.47	0.591	0.576	0.606	0.053	0.017	0.032
AMR	Mult-t-AMR	1449	40219	0.373	0.027	7.11E-45	1.45	1.38	1.53	0.595	0.58	0.61	0.054	0.021	0.043
ASN	Roselli et al.	288	10638	0.418	0.061	5.17E-12	1.52	1.35	1.71	0.611	0.578	0.644	0.042	0.024	0.044
ASN	PRSmix+	288	10638	0.449	0.065	5.01E-12	1.57	1.38	1.78	0.608	0.573	0.643	0.041	0.024	0.045
ASN	ALLmeta	288	10638	0.49	0.061	1.13E-15	1.63	1.45	1.84	0.633	0.6	0.666	0.045	0.032	0.056
ASN	Mult-t-ASN	288	10638	0.567	0.062	8.81E-20	1.76	1.56	1.99	0.637	0.603	0.672	0.055	0.042	0.074
Note: AFR, African; ALL, all-ancestry; AMR, Admixed American; ASN, Asian (East Asian + South Asian); AUROC, Area Under the Receiver Operator Curve; AUPRC, Area Under the Precision Recall Curve; Beta, effect size; CI.H.OR/AUROC, Confidence Interval Upper Bound; CI.L.OR/AUROC, Confidence Interval Lower Bound; EUR, European; .full, full model with age and sex as covariates; liab_R2_delta_o_resid, Li…

## Sheet: Mixing_Weights
European (EUR)						Note: AF, atrial fibrillation; BMI, body mass index; CAD, coronary artery disease; DCM, dilated cardiomyopathy; HF, heart failure; Mixing Proportion, coefficients normalized to sum to 100%; Mixing Weight, scaled regression coefficients; PGS, Polygenic Score; PR, PR-interval; SBP, systolic blood pressure; SD in Tune, standard deviation of the PGS in the tuning set.
PGS	Mixing Weight	Mixing Proportion	SD in Tune
AF	0.44752	62.8732	0.741589
HF	0.0210267	2.95409	0.399092
BMI	0.0520509	7.31276	0.264588
Height	0.105347	14.8005	0.820533
CAD	0.0492234	6.91552	0.501589
SBP	-0.00904151	1.27026	0.211387
DCM	-0.0256643	3.60564	0.712613
PR	-0.00190796	0.268054	7.75772
African (AFR)
AF	0.224865	42.3718	0.675776
HF	0.0732088	13.7949	0.383292
BMI	0.0879577	16.574	0.266167
Height	0.105135	19.8107	1.01722
CAD	-0.0144185	2.7169	0.49439
SBP	0.0110165	2.07586	0.203812
DCM	0.000201235	0.0379191	0.613062
PR	-0.0138933	2.61794	6.97065
Admixed American (AMR)
AF	0.279136	35.7915	0.782792
HF	0.170181	21.8209	0.413636
BMI	0.0768462	9.85339	0.289788
Height	0.158971	20.3836	1.08707
CAD	0.0559014	7.16781	0.79957
SBP	0.00573919	0.735892	0.213735
DCM	-0.0101796	1.30525	0.682453
PR	0.0229416	2.94163	7.62593
Asian (ASN)
AF	0.408501	44.1392	0.745608
HF	0.0250108	2.70246	0.52538
BMI	0.0699135	7.55426	0.370618
Height	0.215447	23.2794	1.1625
CAD	0.164642	17.7898	0.837136
SBP	-0.014343	1.54978	0.255198
DCM	-0.0226595	2.44839	0.828415
PR	-0.00496681	0.536672	7.58509

## Sheet: Unscaled_Coef
European (EUR)						Note: AF, atrial fibrillation; BMI, body mass index; CAD, coronary artery disease; DCM, dilated cardiomyopathy; HF, heart failure; Ngk-R² in Tune, Nagelkerke's R² of the PRS in the tuning set; PGS, Polygenic Score; PR, PR-interval; Proportion, coefficients normalized to sum to 100%; Regcoef, unscaled regression coefficients; SBP, systolic blood pressure.
PGS	Regcoef	Proportion	Ngk-R² in Tune
AF	0.603461	52.0931	0.0404752
HF	0.0526863	4.54809	0.00656596
BMI	0.196724	16.982	0.00149821
Height	0.128389	11.083	0.00423785
CAD	0.0981349	8.4714	0.00177025
SBP	-0.0427722	3.69227	0.000197258
DCM	-0.0360143	3.1089	4.73e-08
PR	-0.000245943	0.0212307	2.07e-08
African (AFR)
AF	0.332751	31.9001	0.00945659
HF	0.191	18.3107	0.00322664
BMI	0.330461	31.6805	0.00178428
Height	0.103355	9.90842	0.00212434
CAD	-0.0291642	2.7959	0.000248186
SBP	0.0540525	5.18188	0.000134941
DCM	0.000328246	0.0314681	1.53e-05
PR	-0.00199311	0.191075	5.81e-05
Admixed American (AMR)
AF	0.356591	27.5546	0.0171757
HF	0.411426	31.7918	0.0113912
BMI	0.26518	20.4911	0.00110577
Height	0.146238	11.3001	0.00638347
CAD	0.0699144	5.40244	0.00440727
SBP	0.0268519	2.07491	0.000290532
DCM	-0.0149162	1.1526	0.0001443
PR	0.00300837	0.232463	3.31e-06
Asian (ASN)
AF	0.547876	43.8183	0.0378912
HF	0.0476052	3.80739	2.3e-05
BMI	0.18864	15.0872	0.00613519
Height	0.185331	14.8225	0.0198703
CAD	0.196673	15.7296	0.0188054
SBP	-0.0562034	4.49506	0.00235706
DCM	-0.0273528	2.18764	0.00298747
PR	-0.000654813	0.0523709	1.02e-07

## Sheet: Separate_Traits
Cohort	PGS	Cases	Total	Beta.full	SE.full	P.full	OR.full	CI.L.OR.full	CI.H.OR.full	AUROC.prs	CI.L.AUROC.prs	CI.H.AUROC.prs	AUPRC.prs	ngk_R2_delta_o_resid	liab_R2_delta_o_resid
EUR	AF	11087	124367	0.597	0.011	<1.00E-300	1.82	1.78	1.85	0.642	0.637	0.647	0.155	0.065	0.098
EUR	HF	11087	124367	0.321	0.011	9.15E-204	1.38	1.35	1.41	0.558	0.552	0.563	0.107	0.019	0.036
EUR	BMI	11087	124367	0.172	0.011	1.11E-59	1.19	1.16	1.21	0.525	0.519	0.53	0.096	0.005	0.011
EUR	Height	11087	124367	0.17	0.012	1.51E-46	1.19	1.16	1.21	0.544	0.538	0.55	0.103	0.004	0.006
EUR	CAD	11087	124367	0.124	0.011	7.99E-32	1.13	1.11	1.16	0.521	0.515	0.527	0.096	0.003	0.006
EUR	SBP	11087	124367	0.091	0.01	1.31E-18	1.1	1.07	1.12	0.511	0.505	0.516	0.093	0.002	0.004
EUR	DCM	11087	124367	0.037	0.01	2.26E-04	1.04	1.02	1.06	0.508	0.502	0.513	0.092	0	0.001
EUR	PR	11087	124367	0.015	0.01	1.37E-01	1.02	1	1.04	0.504	0.498	0.51	0.091	0	0
Cohort	PGS	Cases	Total	Beta.full	SE.full	P.full	OR.full	CI.L.OR.full	CI.H.OR.full	AUROC.prs	CI.L.AUROC.prs	CI.H.AUROC.prs	AUPRC.prs	ngk_R2_delta_o_resid	liab_R2_delta_o_resid
AFR	AF	2112	44692	0.274	0.024	3.76E-30	1.32	1.25	1.38	0.566	0.554	0.579	0.061	0.01	0.018
AFR	HF	2112	44692	0.219	0.024	7.00E-20	1.24	1.19	1.31	0.547	0.534	0.56	0.056	0.006	0.015
AFR	BMI	2112	44692	0.16	0.024	2.34E-11	1.17	1.12	1.23	0.532	0.52	0.545	0.054	0.003	0.008
AFR	Height	2112	44692	0.047	0.019	1.36E-02	1.05	1.01	1.09	0.516	0.503	0.529	0.05	0	0.001
AFR	CAD	2112	44692	0.087	0.025	4.20E-04	1.09	1.04	1.15	0.517	0.505	0.53	0.05	0.001	0.002
AFR	SBP	2112	44692	0.115	0.024	1.24E-06	1.12	1.07	1.18	0.525	0.513	0.538	0.051	0.002	0.004
AFR	DCM	2112	44692	0.053	0.026	4.36E-02	1.05	1	1.11	0.515	0.503	0.528	0.049	0	0.001
AFR	PR	2112	44692	0.014	0.024	5.64E-01	1.01	0.97	1.06	0.504	0.492	0.517	0.049	0	0
Cohort	PGS	Cases	Total	Beta.full	SE.full	P.full	OR.full	CI.L.OR.full	CI.H.OR.full	AUROC.prs	CI.L.AUROC.prs	CI.H.AUROC.prs	AUPRC.prs	ngk_R2_delta_o_resid	liab_R2_delta_o_resid
AMR	AF	1449	40219	0.332	0.026	2.93E-37	1.39	1.32	1.47	0.591	0.576	0.606	0.053	0.017	0.032
AMR	HF	1449	40219	0.229	0.027	2.04E-17	1.26	1.19	1.33	0.554	0.538	0.569	0.044	0.008	0.018
AMR	BMI	1449	40219	0.176	0.027	6.44E-11	1.19	1.13	1.26	0.541	0.526	0.556	0.041	0.004	0.012
AMR	Height	1449	40219	0.059	0.025	2.04E-02	1.06	1.01	1.12	0.519	0.504	0.535	0.039	0.001	0.001
AMR	CAD	1449	40219	0.112	0.025	8.34E-06	1.12	1.06	1.17	0.53	0.515	0.545	0.04	0.002	0.005
AMR	SBP	1449	40219	0.159	0.027	3.59E-09	1.17	1.11	1.24	0.539	0.524	0.555	0.042	0.004	0.008
AMR	DCM	1449	40219	0.012	0.027	6.73E-01	1.01	0.96	1.07	0.5	0.485	0.516	0.037	0	0
AMR	PR	1449	40219	0.013	0.027	6.19E-01	1.01	0.96	1.07	0.501	0.486	0.516	0.036	0	0
Cohort	PGS	Cases	Total	Beta.full	SE.full	P.full	OR.full	CI.L.OR.full	CI.H.OR.full	AUROC.prs	CI.L.AUROC.prs	CI.H.AUROC.prs	AUPRC.prs	ngk_R2_delta_o_resid	liab_R2_delta_o_resid
ASN	AF	288	10638	0.49	0.061	1.13E-15	1.63	1.45	1.84	0.633	0.6	0.666	0.045	0.032	0.056
ASN	HF	288	10638	0.407	0.072	1.24E-08	1.5	1.31	1.73	0.589	0.555	0.623	0.038	0.016	0.036
ASN	BMI	288	10638	0.3	0.061	1.00E-06	1.35	1.2	1.52	0.56	0.525	0.594	0.037	0.012	0.027
ASN	Height	288	10638	0.18	0.061	3.02E-03	1.2	1.06	1.35	0.535	0.501	0.569	0.032	0.004	0.009
ASN	CAD	288	10638	0.141	0.061	2.06E-02	1.15	1.02	1.3	0.537	0.502	0.572	0.032	0.003	0.005
ASN	SBP	288	10638	0.164	0.067	1.51E-02	1.18	1.03	1.34	0.543	0.507	0.578	0.032	0.003	0.007
ASN	DCM	288	10638	0.054	0.065	4.06E-01	1.06	0.93	1.2	0.518	0.484	0.552	0.029	0	0
ASN	PR	288	10638	0.021	0.066	7.55E-01	1.02	0.9	1.16	0.5	0.466	0.533	0.027	0	0
Note: AF, atrial fibrillation; AFR, African; ALL, all-ancestry; AMR, Admixed American; ASN, Asian (East Asian + South Asian); AUROC, Area Under the Receiver Operator Curve; AUPRC, Area Under the Precision Recall Curve; Beta, effect size; BMI, body mass index; CAD, coronary artery disease; CI.H.OR/AUROC, Confidence Interval Upper Bound; CI.L.OR/AUROC, Confidence Interval Lower Bound; DCM, dilated …

## Sheet: UKB_Results
Cohort	PGS	Cases	Total	Beta.full	SE.full	P.full	OR.full	CI.L.OR.full	CI.H.OR.full	AUROC.prs	CI.L.AUROC.prs	CI.H.AUROC.prs	AUPRC.prs	ngk_R2_delta_o_resid	liab_R2_delta_o_resid
AFR	Roselli et al.	247	7382	0.253	0.066	1.23e-04	1.29	1.13	1.47	0.567	0.531	0.603	0.043	0.008	0.017
AFR	Mult-t-AFR	247	7382	0.262	0.065	5.48e-05	1.3	1.14	1.48	0.575	0.537	0.613	0.045	0.009	0.018
ASN	Roselli et al.	255	6770	0.352	0.065	6.84e-08	1.42	1.25	1.62	0.592	0.557	0.627	0.054	0.017	0.03
ASN	Mult-t-ASN	255	6770	0.528	0.066	1.06e-15	1.7	1.49	1.93	0.642	0.608	0.676	0.064	0.038	0.065
Note: AFR, African; ASN, Asian (East Asian + South Asian); AUROC, Area Under the Receiver Operator Curve; AUPRC, Area Under the Precision Recall Curve; Beta, effect size; CI.H.OR/AUROC, Confidence Interval Upper Bound; CI.L.OR/AUROC, Confidence Interval Lower Bound; .full, full model with age and sex as covariates; liab_R2_delta_o_resid, Liability delta R² (ΔR² = R²_full − R²_base) divided by the…

[truncated: 4 more sheets: noMA_noVA, Subsets, Training_Data, Pheno_codes]
